# Supplementary material for: Composite scaffolds of gelatin and gold nanoparticles with tunable size and shape for photothermal cancer therapy
Source: Royal Society of Chemistry journal article supplement (doi:10.1039/c6tb02872a), 2016-11-29
Supplement: c6tb02872a1.pdf [file c6tb02872a1.pdf]

## Supporting information

### **Composite scaffolds of gelatin and gold nanoparticles with tunable size and shape for photothermal cancer therapy**

Jing Zhang,<sup>a,b</sup> Jingchao Li,<sup>a,b</sup> Naoki Kawazoe<sup>a</sup> and Guoping Chen<sup>\*a,b</sup>

<sup>a</sup> International Center for Materials Nanoarchitectonics, National Institute for

Materials Science, 1-1 Namiki, Tsukuba, Ibaraki 305-0044, Japan

<sup>b</sup> Department of Materials Science and Engineering, Graduate School of Pure and

Applied Sciences, University of Tsukuba, 1-1-1 Tennodai, Tsukuba, Ibaraki 305-8571,

Japan

\*Corresponding Author

E-mail: Guoping.Chen@nims.go.jp

Fax: +81-29-860-4706; Tel: +81-29-860-4496;

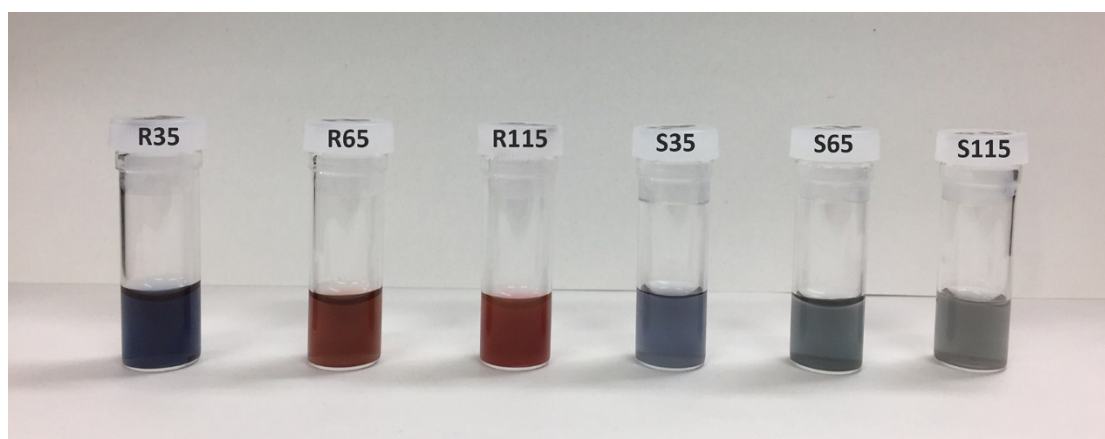

Fig. S1 Gross appearance of R35, R65, R115, S35, S65 and S115.
